# Supplementary material for: Selective Blocking of Graphene Defects Using Polyvinyl Alcohol through Hydrophilicity Difference
Source: MDPI journal article supplement (doi:10.3390/ma16052001), 2023-02-28
Supplement: s1 [file s1]

Supporting information

# Selective Blocking of Graphene Defects Using Polyvinyl Alcohol through Hydrophilicity Difference

Yoonjeong Kim <sup>1</sup>, Yanghui Kim <sup>1,2</sup> and Seokhoon Ahn <sup>1,\*</sup>

<sup>1</sup> Institute of Advanced Composite Materials, Korea Institute of Science and Technology (KIST), Jeonbuk 55324, Republic of Korea

<sup>2</sup> School of Semiconductor and Chemical Engineering, Jeonbuk National University, Jeonbuk 54896, Republic of Korea

\* Correspondence: ahn75@kist.re.kr; Tel.: +82-63-219-8157

**Keywords:** graphene; defect healing; polyvinyl alcohol (PVA); hydrophilic interactions

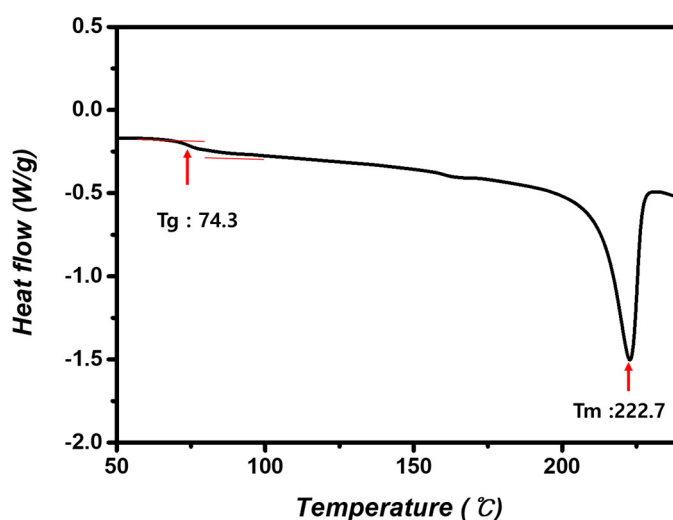

**Figure S1.** DSC curve of PVA powder. Glass-transition temperature (Tg) is 74.3°C, and melting temperature (Tm) is 222.7°C.
